1 **Low dose prime and delayed boost can improve COVID-19 vaccine efficacies by**  
2 **increasing B cell selection stringency in germinal centres**

3

4 Amar K. Garg<sup>1,#</sup>, Soumya Mittal<sup>1</sup>, Pranesh Padmanabhan<sup>2</sup>, Rajat Desikan<sup>1,‡</sup>, Narendra M. Dixit<sup>1,3,\*</sup>

5

6 <sup>1</sup>Department of Chemical Engineering, Indian Institute of Science, Bangalore, India 560012

7 <sup>2</sup>Clem Jones Centre for Ageing Dementia Research, Queensland Brain Institute, The University of Queensland,  
8 Brisbane, Australia 4072

9 <sup>3</sup>Centre for Biosystems Science and Engineering, Indian Institute of Science, Bangalore, India 560012

10 #Current Address: Helmholtz Centre for Infection Research, Braunschweig, Germany

11 ‡Current Address: Certara QSP, Certara UK Limited, Sheffield, UK

12

13 **\*Correspondence:**

14 Narendra M. Dixit

15 Email: [narendra@iisc.ac.in](mailto:narendra@iisc.ac.in)

16 Address: Department of Chemical Engineering, Indian Institute of Science, Bangalore, 560012, Karnataka,  
17 India

18

19

20

21

22

## 23 **ABSTRACT**

24 The efficacy of COVID-19 vaccines appears to depend in complex ways on the vaccine dosage  
25 and the interval between the prime and boost doses. Unexpectedly, lower dose prime and longer  
26 prime-boost intervals have yielded higher efficacies in clinical trials. To elucidate the origins  
27 of these effects, we developed a stochastic simulation model of the germinal centre (GC)  
28 reaction and predicted the antibody responses elicited by different vaccination protocols. The  
29 simulations predicted that a lower dose prime could increase the selection stringency in GCs  
30 due to reduced antigen availability, resulting in the selection of GC B cells with higher affinities  
31 for the target antigen. The boost could relax this selection stringency and allow the expansion  
32 of the higher affinity GC B cells selected, improving the overall response. With a longer dosing  
33 interval, the decay in the antigen with time following the prime could further increase the  
34 selection stringency, amplifying this effect. The effect remained in our simulations even when  
35 new GCs following the boost had to be seeded by memory B cells formed following the prime.  
36 These predictions offer a plausible explanation of the observed paradoxical effects of dosage  
37 and dosing interval on vaccine efficacy. Tuning the selection stringency in the GCs using  
38 prime-boost dosages and dosing intervals as handles may help improve vaccine efficacies.

## 39 INTRODUCTION

40 The COVID-19 pandemic continues to rage and warrants intensifying the ongoing global  
41 vaccination programs (1, 2). With limited vaccine supplies, it becomes critical to identify  
42 dosing protocols that would maximize vaccine efficacy (3, 4). With the Oxford-AstraZeneca  
43 vaccine, where dosing protocols were adjusted during the trials, data has become available of  
44 the effects of different dosages used for the prime and boost doses and of different intervals  
45 separating them on vaccine efficacy (5-8). A recent study has also examined the effects of  
46 increasing the interval beyond those in the trials (9). Intriguingly, the efficacy in preventing  
47 symptomatic infection was 63.1% when a standard dose (containing  $5 \times 10^{10}$  virus particles) was  
48 used for both prime and boost, whereas the efficacy was substantially higher, 80.7%, when a  
49 low dose prime (containing  $2.2 \times 10^{10}$  virus particles) followed by the standard dose boost was  
50 administered (5). Furthermore, the efficacy increased with the interval between the prime and  
51 boost, from 55.1% at  $<6$  weeks to 81.3% at  $\geq 12$  weeks, when standard doses were used for  
52 both (5). Inspired by these observations, studies are examining the effects of lower dosages and  
53 increased dosing intervals with other vaccines too, specifically the Pfizer-BioNTech (10-12)  
54 and Moderna (13) vaccines. An understanding of these effects would help identify optimal  
55 dosing protocols and maximize the impact of the ongoing vaccination programs. The origins  
56 of the effects remain to be elucidated.

57 While the role of cellular immunity is yet to be fully elucidated (14), several studies  
58 suggest that the efficacy of currently approved COVID-19 vaccines is attributable to the  
59 neutralizing antibodies they elicit (6, 11, 15-20). The higher efficacies observed above are thus  
60 argued to be due to the improved quality and quantity of the antibodies produced by the

61 associated dosing protocols (5, 8, 9, 11, 21). For instance, higher antibody levels were observed  
62 following the boost upon increasing the dosing interval (9, 10). In some cases, antibody-  
63 dependent cellular functions too appeared to be better with the longer intervals (21). A question  
64 that arises is how the different dosing protocols elicit antibodies of different amounts and  
65 affinities for their targets.

66       Antibody production following vaccination (or natural infection) occurs in germinal  
67 centers (GCs) (22, 23). GCs are temporary anatomical structures assembled in lymphoid organs  
68 where B cells are locally selected based on the ability of their receptors to bind and internalize  
69 antigen presented as immune complexes on follicular dendritic cell surfaces in the GCs. (GCs  
70 can last anywhere from a few weeks to many months (23-25).) This process, termed affinity  
71 maturation, culminates, typically in weeks, in the selection of B cells with affinities that can be  
72 several orders of magnitude higher for the target antigen than those at the start of the GC  
73 reaction (26, 27). What determines the final affinities is an important question in immunology  
74 and is yet to be resolved (28-30). Several studies have identified factors that influence affinity  
75 maturation (26, 31-37). A key factor is antigen availability within GCs—related here to the  
76 vaccine dosage and antigen half-life—elucidated first by the classic experiments of Eisen and  
77 colleagues (26): B cells compete for antigen in the GCs. Their survival depends on how much  
78 antigen they acquire, as we explain below. Thus, if antigen is scarce, the selection is stringent  
79 and leads to the survival of those B cells that have high affinity for the target antigen. This  
80 phenomenon governing the GC reaction is manifested widely, including in the effects of  
81 passive immunization following HIV infection, and can be potentially exploited by tuning  
82 antigen availability (34, 35, 38, 39).

83 Here, we reasoned that one way in which the effects of the different vaccination  
84 protocols could arise was from the influence the protocols had on antigen availability and hence  
85 selection stringency within GCs. Specifically, low dose prime is expected to result in low  
86 antigen availability and may lead to the selection of higher affinity B cells. The standard dose  
87 boost could then enable the expansion of these higher affinity B cells. With a larger dosing  
88 interval, the decay of antigen between doses could cause an increase in selection stringency,  
89 resulting in a similar effect. To test this hypothesis, we developed a detailed stochastic  
90 simulation model of the GC reaction. Such simulation models have been shown to mimic the  
91 GC reaction faithfully and have helped resolve confounding experimental observations and  
92 predict optimal vaccination protocols (34-36, 39-44).

93

## 94 **RESULTS**

### 95 **Stochastic simulation model of the GC reaction post COVID-19 vaccination**

96 We present an overview of the model here (Fig. 1); details are in Methods. We  
97 considered individuals who were not previously infected and were administered COVID-19  
98 vaccines. We focused on the GC reaction in such individuals. The simulation, building on  
99 previous protocols (35, 36, 39, 40, 42), considered and modelled events within an individual  
100 GC. The GC reaction is initiated by B cells of low affinity for a target, non-mutating antigen.  
101 The target could be a portion of or the entire spike protein of SARS-CoV-2. We simulated the  
102 ensuing affinity maturation process using a discrete generation, Wright-Fisher-type, formalism  
103 (36, 39). The GC is divided into a light zone and a dark zone (Fig. 1A). The antigen is presented  
104 in the light zone and is represented as a bit-string of  $L$  amino acids. Each B cell is identified by

105 its B cell receptor (BCR), which is also represented as a bit-string of  $L$  amino acids. The affinity  
106 of a B cell for the antigen is determined by the extent of the match between the BCR and antigen  
107 sequences (39, 42), defined here using  $\varepsilon$ .  $\varepsilon=0$  if the two sequences are completely distinct,  
108 whereas  $\varepsilon=L$  if they are identical. The higher the  $\varepsilon$ , the higher is the affinity. In each generation,  
109 we let each B cell have an average of  $\eta$  attempts to acquire antigen.  $\eta$  thus serves as a surrogate  
110 of antigen availability in the GC (39). The probability with which a B cell acquires antigen in  
111 each attempt is set proportional to its affinity for the antigen (39). If a B cell fails to acquire a  
112 minimum amount of antigen, it is assumed to undergo apoptosis (31), and is eliminated. The  
113 surviving B cells then compete for help from T follicular helper ( $T_{fh}$ ) cells. The probability that  
114 a B cell receives such help is set proportional to the amount of antigen it has acquired relative  
115 to that of the other B cells in the generation (39). B cells that do not succeed in receiving  $T_{fh}$   
116 help are again assumed to undergo apoptosis (31). Among the surviving B cells, following  
117 previous studies (39), we let 5% exit the GC, become plasma cells, and produce antibodies; 5%  
118 exit and become memory B cells; and 90% migrate to the dark zone, where they proliferate and  
119 mutate their BCR genes and return to the light zone (39, 43). The latter B cells form the pool  
120 for the next generation of the GC reaction. The antibodies produced by plasma cells can  
121 feedback into the GC and, by displacing lower affinity antibodies in the immune complexes or  
122 by masking antigen, tend to increase the selection stringency (35, 39, 45).

123       Following dosing, antigen is trafficked to the lymph nodes, where its levels rise rapidly  
124 and then decline exponentially (34, 46). Accordingly, we let  $\eta$  rise immediately upon dosing  
125 to a pre-determined amount dependent on the vaccine dosage and then decrease with each  
126 generation based on the half-life of the administered antigen (Fig. 1B). With the boost, we

127 considered two scenarios (34, 47, 48): the first where the boost enhanced antigen levels in pre-  
128 existing GCs, and the second where it initiated new GCs using memory B cells formed by the  
129 prime.

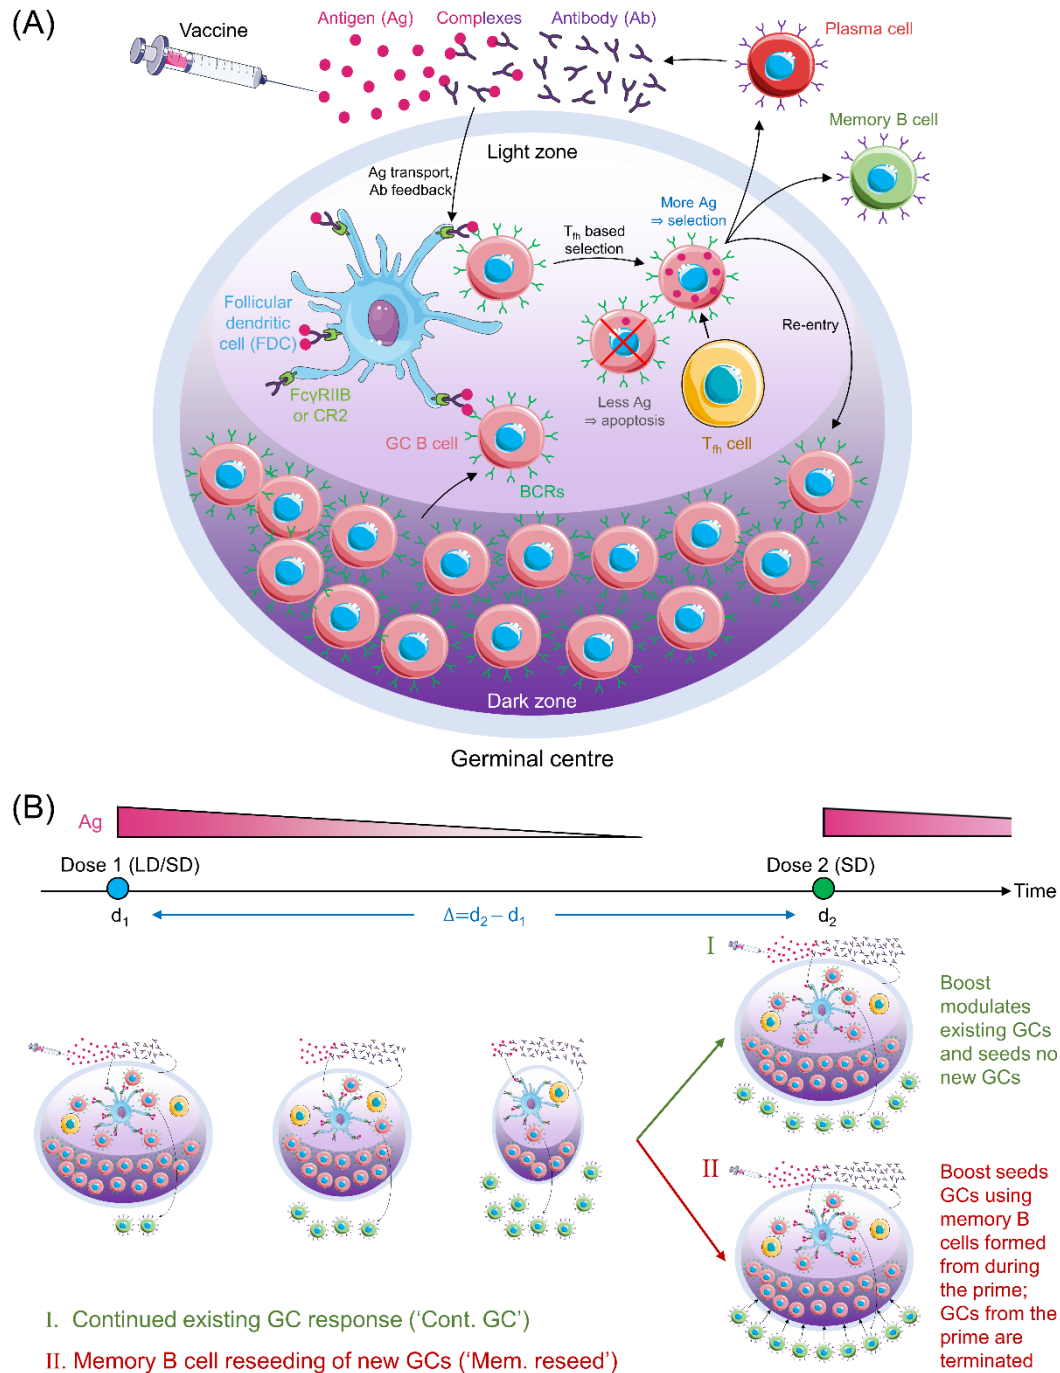

130

131 **Figure 1. Schematic of the GC reaction model post vaccination.** (A) The GC reaction. The  
132 antigen from the vaccine enters the GC complexed to antibodies and is presented in the light  
133 zone on the surfaces of follicular dendritic cells attached to FcγRIIB or CR2 receptors. GC B  
134 cells acquire antigen with a probability proportional to their affinity for the antigen. They then

135 receive help from T follicular helper cells with a probability dependent on the relative amount  
136 of antigen they acquired. Cells that fail to acquire antigen or receive the latter help die. Cells  
137 that succeed can exit the GC to become plasma cells and secrete antibodies, become memory  
138 B cells, or migrate to the dark zone, where they proliferate and mutate their antibody genes.  
139 The latter cells circulate back to the light zone and become subjected to the same selection  
140 process. Antibodies secreted by plasma cells can feedback into the GC and affect the selection  
141 process. (B) Schematic of the simulations. (Top) Timeline showing dose administration and  
142 corresponding antigen levels. (Bottom) GCs are formed following the prime and gradually  
143 shrink with time due to decreasing antigen levels. The prime could be low dose (LD) or  
144 standard dose (SD). The boost could restore existing GCs (mechanism I) or lead to new GCs  
145 seeded by memory B cells formed during the prime (mechanism II). The boost is typically SD.  
146

147 We also examined the baseline, control scenario where the boost initiated GCs *de novo*,  
148 independently of the prime. We considered vaccination protocols with low and standard dose  
149 prime and a range of prime-boost dosing intervals. We performed multiple stochastic  
150 realizations of the simulations for each vaccination protocol and predicted the expected  
151 antibody response as an indicator of vaccine efficacy.

152

### 153 **Antigen availability and its effect on selection stringency**

154 To elucidate affinity maturation in the GC reaction, we first performed simulations with  
155 a constant  $\eta$ , set here to 7. (We considered other values of  $\eta$  later.) The GC initially had B cells  
156 with low affinity for the target antigen. As the GC reaction proceeded, B cells with increasing  
157 affinity were selected in our simulations, marking affinity maturation (Fig. 2A). Eventually, a  
158 stationary distribution of B cells of different affinities was achieved, dominated by B cells with  
159 the highest affinities, as observed in previous studies (39) and akin to the mutation-selection  
160 balance observed in other evolutionary simulations (49, 50). We focussed on the corresponding  
161 evolution of the average affinity of the B cells. As the GC reaction progressed, the average



162 affinity of the B cells increased and reached a plateau (Fig. 2B). Thus, when  $\eta=7$ , the average  
 163 affinity of the B cells, determined by the average match-length between the antigen and BCR  
 164 sequences, plateaued at  $\sim 6.7$  (Fig. 2B inset). Note that  $L=8$  in these simulations.

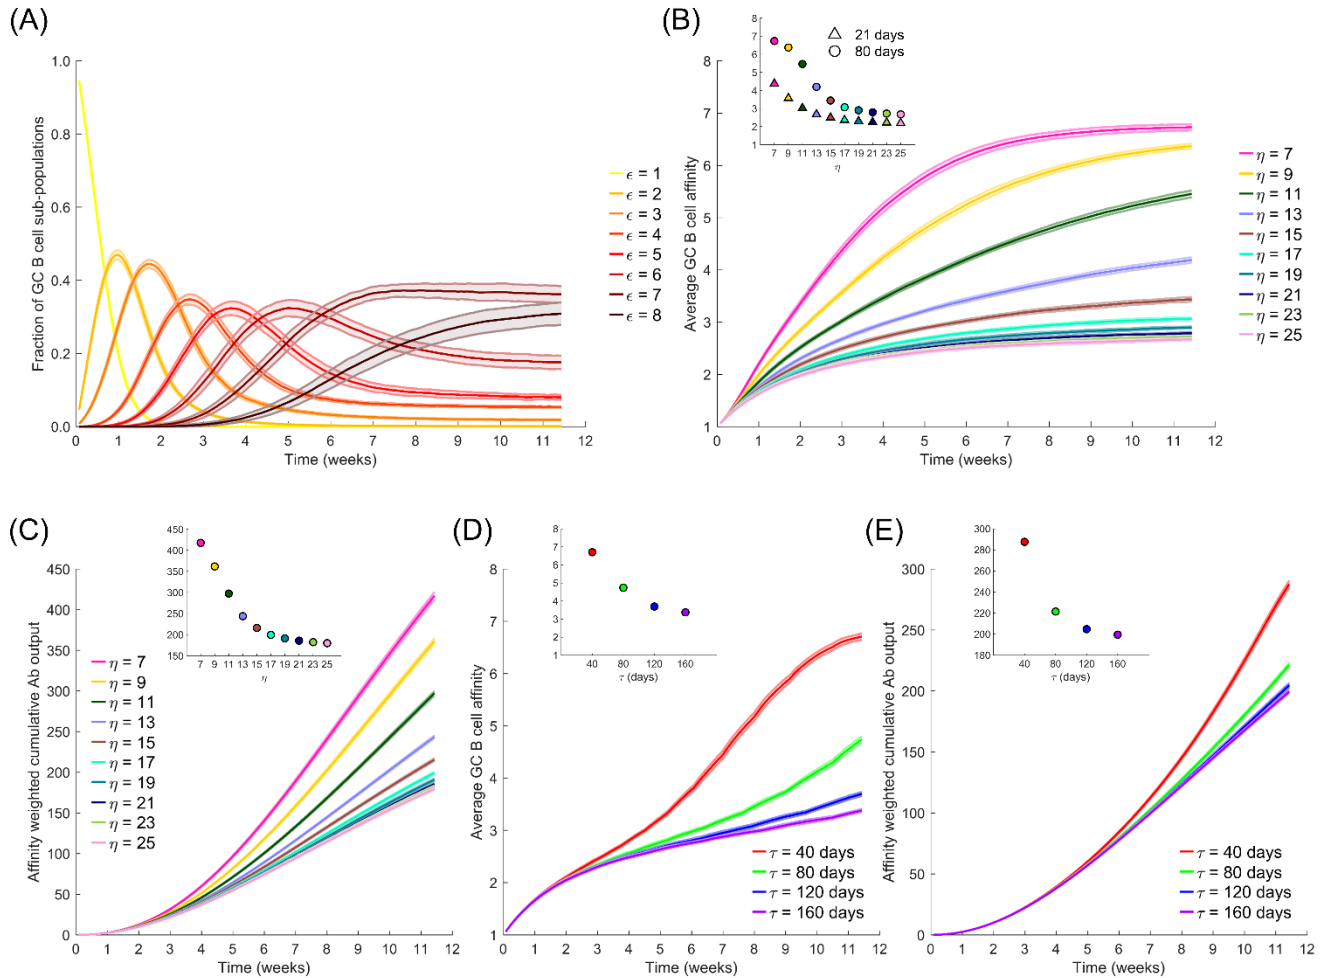

165 **Figure 2. The effect of antigen availability and half-life on the GC reaction.** (A) Time-  
 166 evolution of populations of GC B cells of different affinity,  $\epsilon$ , for the antigen;  $\eta=7$ . (B) Time-  
 167 evolution of the average affinity of GC B cells for different  $\eta$ . *Inset:* The values at day 21 and  
 168 day 80, the latter the plateau values, of the average affinity versus  $\eta$ . (C) Time-evolution of the  
 169 affinity-weighted cumulative antibody output for different  $\eta$ . (D) Time-evolution of the  
 170 average affinity for different antigen half-lives,  $\tau$ , and the initial  $\eta$ ,  $\eta_0=20$ . (E) Corresponding  
 171 cumulative antibody output. *Insets in (C-E):* Corresponding values at day 80.

172  
 173

174 To examine the effect of antigen availability, we next performed simulations at different  
175 values of  $\eta$ . Increasing  $\eta$  resulted in a lower value of the plateau of the average affinity (Fig.  
176 2B), indicative of weaker selection. Increasing  $\eta$  would correspond to higher vaccine dosages.  
177 B cells with lower affinities were selected with higher  $\eta$  because more opportunities were  
178 available for antigen acquisition. Thus, the average affinity plateaued at  $\sim 3.4$  when  $\eta=15$  and  
179 decreased further with larger  $\eta$  (Fig. 2B inset). This is consistent with the classic observations  
180 of poorer affinity maturation with increasing antigen levels (26, 39). In terms of the absolute  
181 antibody titres, our simulations predicted that unless the selection stringency was so large that  
182 the GC B cell population began to decline causing GC collapse (Fig. S1), the GC B cell  
183 population was maintained, leading to a steady output of Abs from the GC (Fig. S2). The lower  
184 affinity with increasing  $\eta$  thus resulted in a corresponding decrease in the affinity-weighted  
185 cumulative antibody output in our simulations (Fig. 2C). The latter output was  $\sim 417$  when  $\eta=7$   
186 and  $\sim 216$  when  $\eta=15$  at 80 d following dosing (Fig. 2C inset). This affinity-weighted antibody  
187 output would serve as a measure of the humoral response elicited by vaccination; it accounts  
188 for the effects of both the quality and the quantity of the response. At very high values of  $\eta$ ,  
189 beyond  $\sim 20$  in our simulations, the effect of varying  $\eta$  was minimal (Fig. 2B and C), indicating  
190 that at sufficiently high dosages, the effect of varying dosage on the GC reaction may not be  
191 significant. At lower  $\eta$ , between 7 and 15 in our simulations, lowering dosage resulted in a  
192 substantial gain in the GC response. When  $\eta$  was too low, however, in our simulations, GCs  
193 collapsed, as not enough antigen was available for sustaining the B cell population (Fig. S1).

194 Following vaccination, antigen levels are expected to decline exponentially with time.  
195 We therefore next performed simulations with  $\eta$  decreasing with a half-life  $\tau$ ; i.e.,  $\eta = \eta_0 \exp(-$   
196  $t \times \ln 2 / \tau)$ , where  $\eta_0$  is the peak antigen level achieved soon after dosing. How antigen levels  
197 quantitatively decay on follicular dendritic cells within GCs relative to that in plasma is not  
198 well understood (34, 51, 52). We therefore examined a range of values of  $\tau$ . We found in our  
199 simulations with  $\eta_0 = 20$ , that the average affinity was higher when  $\tau$  was lower (Fig. 2D).  
200 Specifically, the average affinity at day 80 from the start of the GC reaction was  $\sim 6.7$  for  $\tau = 40$   
201 d and  $\sim 3.4$  for  $\tau = 160$  d (Fig. 2D inset). The faster decay of antigen thus increased the selection  
202 stringency within the GC and led to higher affinity B cells. The affinity-weighted cumulative  
203 antibody output, accordingly, increased with decreasing  $\tau$ , consistent with an improved  
204 response due to increased selection stringency (Fig. 2E).

205

### 206 **Prime-boost vaccination: the effect of dosage**

207 We now applied our simulations to mimic the prime-boost vaccination protocols  
208 employed in clinical trials (5). Specifically, we considered low dose (which we set using  $\eta_0 = 10$ )  
209 and standard dose ( $\eta_0 = 20$ ) combinations, administered with a dosing interval  $\Delta = 28$  d  
210 mimicking experimental protocols (5, 6, 21). (Our conclusions are not sensitive to these  
211 parameter settings; see Fig. S3) An important aspect of the humoral response associated with  
212 multiple antigen dosing that remains unknown is whether the subsequent doses modulate GCs  
213 formed following the first dose or seed new GCs. GCs have been observed to persist over  
214 extended durations following COVID-19 vaccination (24). (Such persistent GCs have been

215 seen following natural infection with other viruses too (25).) If the interval  $\Delta$  is relatively small,  
216 one may expect the boost to modulate ongoing GC reactions, as has been suggested previously  
217 (34, 39). However, if  $\Delta$  is large, then the GCs formed by the prime may collapse due to antigen  
218 decay before the boost, so that the seeding of new GCs by the boost is more likely. In the latter  
219 scenario, the effect of the prime must come from the preferential seeding by memory B cells  
220 formed following the prime (47, 48, 53). Recruitment of memory B cells into GCs has been  
221 suggested, especially those B cells that displayed cross reactivity to other circulating human  
222 betacoronaviruses (24). We therefore simulated two limiting scenarios (Fig. 1B): First, we  
223 assumed that the boost modulated existing GCs and seeded no new GCs. Second, we let the  
224 boost seed GCs using the memory B cells formed from the prime and not modulate any existing  
225 GCs. We also simulated a control case where the boost established new GCs *de novo*, without  
226 using memory B cells from the prime, in which case no advantage from the prime is expected.

227         With the boost modulating existing GCs, our simulations predicted an advantage of the  
228 low dose prime over the standard dose prime (blue and red lines in Fig. 3A, B). The average  
229 affinity increased with time more steeply with the low dose until day 28, when the boost was  
230 administered (Fig. 3A). Just prior to boost administration, the average affinity was  $\sim 4.9$  for the  
231 low dose versus  $\sim 2.8$  for the standard dose prime. Correspondingly, the affinity-weighted  
232 cumulative antibody output was higher for the low dose than the standard dose (Fig. 3B). The  
233 administration of the boost caused an increase in antigen availability (Fig. 3A inset), relieving  
234 the selection stringency. The average affinity thus saw a temporary dip (Fig. 3A). However, as  
235 affinity maturation continued, the higher affinity B cells selected with the low dose prime  
236 expanded substantially, yielding a much higher affinity-weighted antibody output than with the

237 standard dose prime (Fig. 3B). The average affinity and the affinity-weighted cumulative  
238 antibody output was higher with the low dose prime than the standard dose prime throughout  
239 our simulations.  
240

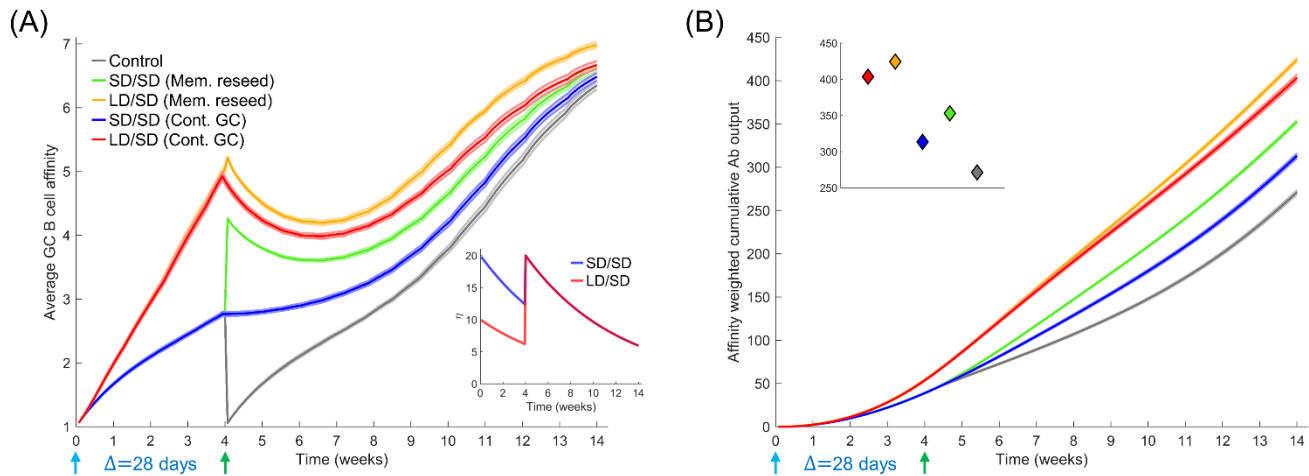

241  
242

243 **Figure 3. Influence of different prime-boost dosages.** (A) Time-evolution of the average  
244 affinity of GC B cells for different dosing protocols indicated. *Inset:* The associated antigen  
245 levels. (B) Time-evolution of the affinity-weighted cumulative antibody output for the cases in  
246 (A). *Inset:* Corresponding values at the final simulation time point. Parameters used:  $\Delta=28$  d;  
247  $\tau=40$  d;  $\eta_0=10$  for LD and  $\eta_0=20$  for SD.

248

249 When we let the boost seed GCs using memory B cells from the prime, the difference  
250 between low dose and standard dose prime was smaller in our simulations following the boost  
251 (green and orange curves in Fig. 3A, B). This is because we assumed that only B cells above a  
252 certain affinity for the antigen (here, match length  $\geq 3$ ; see Methods) could differentiate into  
253 memory B cells following stimulation. The advantage of the low dose prime in yielding high  
254 affinity B cells was thus reduced. The choice of memory B cells is in keeping with the  
255 expectation that low affinity naïve-like B cells may not receive strong enough signals to  
256 differentiate into switched memory B cells (54). Also, low affinity B cells are likely to exist

257 regardless and thus seeding GCs with low affinity memory B cells may be no different from  
258 seeding GCs *de novo*. Yet, even within the memory pool, the low dose prime yielded higher  
259 affinity B cells than the standard dose prime, explaining the advantage of the low dose prime  
260 in our simulations (Fig. 3A). The differences in the corresponding affinity-weighted cumulative  
261 antibody output (Fig. 3B) were as expected but commensurately smaller than when the boost  
262 seeded existing GCs. Both scenarios yielded better responses than the control case where the  
263 boost seeded GCs *de novo* (grey lines in Fig. 3A, B).

264

### 265 **Prime-boost vaccination: the effect of dosing interval**

266 To assess the influence of the dosing interval, we compared next the antibody responses  
267 elicited by two dosing intervals,  $\Delta=28$  d and  $\Delta=56$  d. We let  $\tau=80$  d here to avoid GC collapse  
268 following low dose prime with shorter antigen half-lives (Fig. S4). The average GC B cell  
269 affinity was significantly higher with  $\Delta=56$  d than  $\Delta=28$  d when the GCs were allowed to persist  
270 until the boost (Fig. 4A, B). For instance, the average affinity was  $\sim 6.6$  and  $\sim 4.4$ , respectively,  
271 in the two cases, just before the administration of the boost following low dose prime, because  
272 affinity maturation continued longer with the longer dosing interval. Besides, the declining  
273 antigen levels further increased selection stringency in the latter case. This qualitative trend  
274 remained with the standard dose prime. The affinity-weighted cumulative antibody output was  
275 also significantly higher with the  $\Delta=56$  d than  $\Delta=28$  d (Fig. 4C, D). For instance, 28 d after the  
276 boost, the output was  $\sim 380$  and  $\sim 174$ , respectively, in the two cases, when low dose prime was  
277 used and the boost modulated existing GCs. With standard dose prime too, the difference was  
278 nearly 2-fold. This effect remained whether the boost seeded new GCs or modulated surviving

279 GCs (Fig. 4A-D), indicating a distinct advantage of the longer interval. The cases all yielded  
280 significantly better responses than the control case where the boost elicited GCs *de novo* (Fig.  
281 4A-D).

282 Because the selection stringency depended on antigen half-life,  $\tau$ , we assessed the effect  
283 of varying  $\Delta$  for a range of values of  $\tau$ . Following recent experiments (9, 12), we also  
284 considered much larger values of  $\Delta$ ; ranging from 28 d to 84 d (Figs. 4E, F and S4). To evaluate  
285 the effect on affinity maturation, we compared the maximum value of the average GC B cell  
286 affinity achieved at any time 1 week post the boost (to eliminate transients). We found that at  
287 any  $\tau$ , increasing  $\Delta$  increased the peak affinity, regardless of the use of low dose or standard  
288 dose prime or whether the boost seeded new GCs or affected existing GCs (Fig. 4E). Thus, a  
289 longer duration yielded a GC response of better quality. Further, the lower was  $\tau$ , the higher  
290 was the peak affinity at any  $\Delta$ , consistent with stronger selection stringency associated with  
291 lower antigen availability (Fig. 4E).

292 This latter effect influenced the overall response, combining quality with quantity, which we  
293 assessed using the affinity-weighted cumulative antibody output 28 d post the boost (Fig. 4F).  
294 While the overall trend of improved output with longer  $\Delta$  remained, the trend was more  
295 nuanced. The nuances were due to the complex dynamics of the GC responses following  
296 multiple dosing. We examined first the effect of low dose prime. When  $\tau$  was large, the GC  
297 reaction was sustained longer, allowing greater affinity maturation (Fig. S4). Thus, delayed  
298 dosing interval would lead to better responses. Indeed, with  $\Delta=56$  d and  $\Delta=84$  d, our simulations  
299 predicted that the cumulative output improved with  $\tau$  (Fig. 4F). With  $\Delta=28$  d, the GCs may not

It is made available under a [CC-BY-NC-ND 4.0 International license](https://creativecommons.org/licenses/by-nc-nd/4.0/).

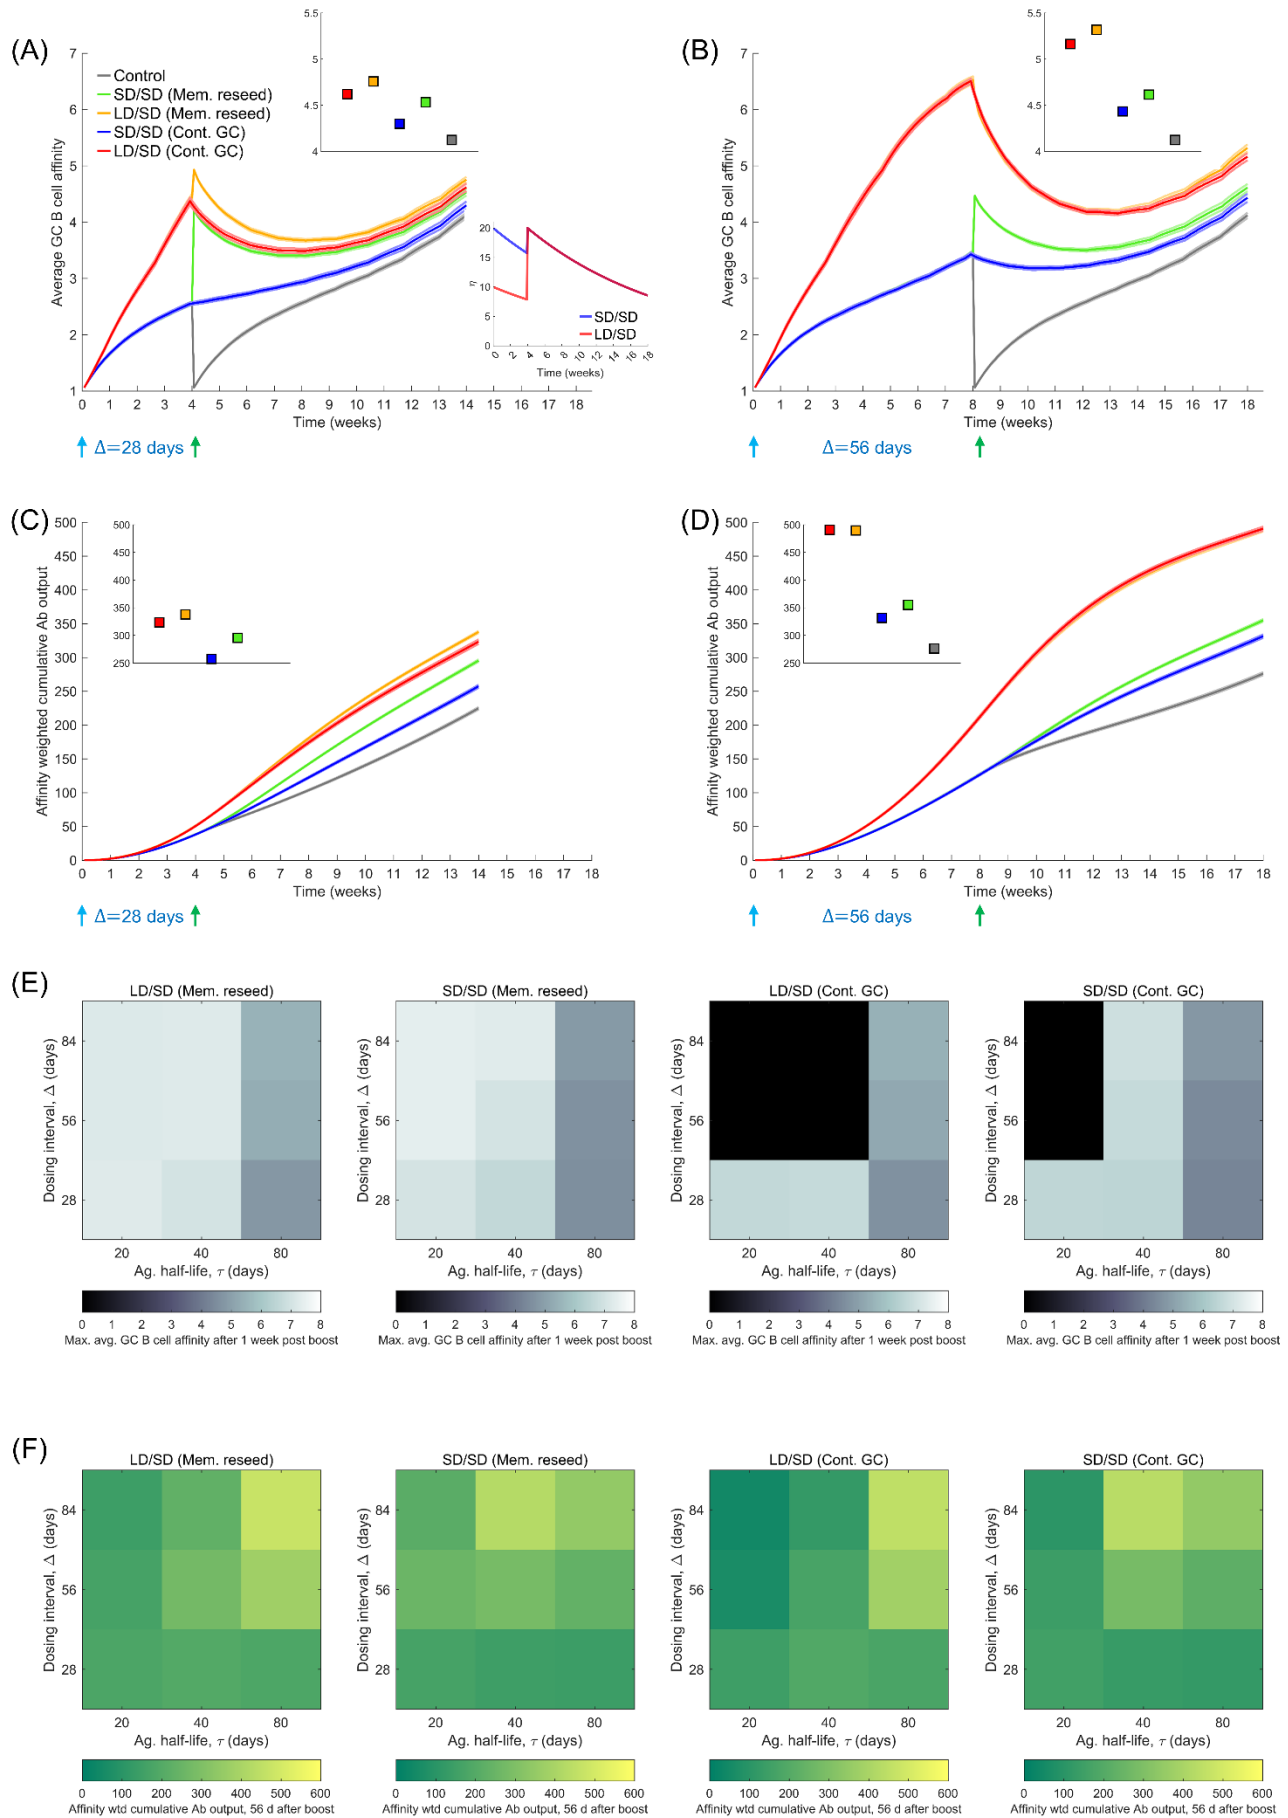



301 **Figure 4. Influence of prime-boost dosing interval.** (A, B) Average GC B cell affinities, and  
302 (C, D) affinity-weighted Ab outputs, with prime-boost intervals ( $\Delta$ ) of either 28 d (A, C) or 56  
303 d (B, D), and with LD/SD or SD/SD dosing. Bottom inset of (A): LD and SD correspond to  
304  $\eta_0=10$  and 20, respectively, with  $\tau=80$  d. Top insets in (A-D): values at the final time point.  
305 Heatmaps of (E) the maximum GC affinity recorded between 1 week post boost administration  
306 and the final time point, and (F) the affinity-weighted cumulative Ab output 28 d post the boost,  
307 as a function of  $\tau$  (20, 40 and 80 d) and  $\Delta$  (4, 8, and 12 weeks) for the two limiting scenarios  
308 (Mem. reseed and Cont. GC). Trajectories corresponding to the heatmaps are shown in Figure  
309 S4. Black regions in (E) correspond to collapsed GCs. A heatmap of the affinity-weighted  
310 cumulative Ab output 56 d post the boost is shown in Figure S4C.

---

311

312 have expanded sufficiently before the boost. With low  $\tau$ , leading to high selection stringency,  
313 GCs tended to collapse after the boost (Fig. S4). With large  $\tau$ , the selection stringency was  
314 weaker and it therefore took longer for affinities to rise. Consequently, intermediate  $\tau$  yielded  
315 the best response (Fig. 4F).

316 With standard dose prime, too, the effects were similar. The GCs were sustained longer  
317 as  $\tau$  increased, but weaker selection due to greater antigen availability led to poorer affinity  
318 maturation (Fig. S4). The trade-off tended to yield the best response at intermediate  $\tau$ . In our  
319 simulations, when the boost contributed to existing GCs, it was not efficient in rescuing GCs  
320 that were beginning to collapse. Thus, with low and intermediate  $\tau$ , GCs tended to collapse  
321 (Fig. S4). When the boost was assumed to seed new GCs using memory cells from the prime,  
322 because the latter had higher affinities for the antigen, the GCs not only survived, but also  
323 expanded. The benefit was amplified with delayed dosing as better memory cells became  
324 available for seeding the GCs. Thus, as long as  $\tau$  was not too small, the cumulative output  
325 tended to improve with increasing  $\Delta$  (see  $\tau=40$  d and 80 d in Fig. 4F). (With very small  $\tau$ , the  
326 increased GC collapse compromised the response at high  $\Delta$ ; see  $\tau=20$  d in Fig. 4F). These

327 trends were maintained when the output was considered 56 d post boost (Fig. S4). That GCs  
328 following COVID-19 vaccination can persist over extended durations (24) suggests that GC  
329 shrinkage may be slow *in vivo*. Large dosing intervals would then improve responses, as has  
330 been observed in clinical trials (9).

331

## 332 **DISCUSSION**

333       Understanding the reasons behind the improved efficacy of COVID-19 vaccines upon  
334 delaying the boost dose or using a low dose prime would aid optimal deployment of vaccines,  
335 critical to settings with limited supplies. Here, using comprehensive stochastic simulations of  
336 the GC reaction post vaccination, we elucidated plausible mechanistic origins of the improved  
337 efficacy. To our knowledge, ours is the first study to employ such simulations to assess the  
338 influence of COVID-19 vaccination protocols. The GC reaction is constrained by a quality-  
339 quantity trade-off (26, 34, 35, 39): Lower antigen availability in the GC leads to more stringent  
340 B cell selection, resulting in the production of higher affinity antibodies but in smaller amounts.  
341 Increasing antigen availability reverses these effects. The different dosing protocols used—low  
342 versus standard dose prime and different dosing intervals—affect this trade-off. With low dose  
343 prime, antigen availability in the GCs is lowered, resulting in the selection of high affinity GC  
344 B cells. The boost relaxes the selection stringency and allows the expansion of the selected B  
345 cells. Delaying the boost delays the relaxation, resulting in even higher affinity B cells getting  
346 selected following the prime. Following the boost, these latter B cells would result in better  
347 overall GC responses, explaining the observed improvements in efficacy.

348 Experimental evidence supports the above reasons. Antibody titres targeting the SARS-  
349 CoV-2 spike were measured in individuals administered the boost 8-12 weeks, 15-25 weeks,  
350 and 44-45 weeks after the prime (9). The titres were consistently higher in the individuals with  
351 the longer dosing intervals. However, interestingly, the titres just before the boost, were lower  
352 in the individuals with the longer intervals. This was consistent with lower antibody output due  
353 to declining antigen availability with time in the GC and the associated GC shrinkage.  
354 Furthermore, the higher corresponding selection stringency may have resulted in the selection  
355 of GC B cells and memory B cells with higher affinity, which would be expected to rescue  
356 shrinking GCs or seed new GCs better, explaining the better responses eventually observed.  
357 Improved antibody responses following delayed boost dosing has now been observed with  
358 multiple vaccines (9-12).

359 With dosing intervals smaller than 8-12 weeks or with the low dose prime, the  
360 differences in antibody titres have been less apparent (5, 8, 21). Yet, the improvement in  
361 vaccine efficacy is substantial (5). While we have argued that this improvement may be due to  
362 the improved affinity of the antibodies, direct measurements of affinity are lacking. *In vitro*  
363 pseudo-typed virus neutralization efficiency of antibodies isolated 28 d after the boost were not  
364 significantly different between individuals administered the low dose prime or the standard  
365 dose prime or when both standard doses were administered with a 28 d or 56 d interval (5, 8,  
366 21). It is possible that the improvements in affinity may not be adequate to be manifested as  
367 improved *in vitro* neutralization efficiencies, possibly because the stoichiometry of antibody  
368 binding to the viral spike proteins that ensures virus neutralization (55-57), which is yet to be  
369 estimated for SARS-CoV-2, may be realized in both scenarios. *In vitro* neutralization

370 efficiencies tend to be much higher than corresponding *in vivo* efficiencies (58). Nonetheless,  
371 greater affinity maturation with lower antigen availability has been long recognized as a  
372 hallmark of the GC reaction (26, 34, 35, 39). In independent studies on HIV vaccination, for  
373 instance, protocols that allowed antigen levels to rise with time, akin to low dose prime  
374 followed by standard dose boost examined here, elicited better antibody responses than  
375 protocols that held the antigen levels constant or allowed them to decline with time (34), an  
376 effect consistent with the dosing protocols modulating antigen availability and the associated  
377 quality-quantity trade-off in the GCs (39).

378 Our simulations predicted a role for antigen half-life in the response to vaccination. With  
379 longer half-lives, the response improved upon increasing the dosing interval. With shorter half-  
380 lives, if associated GC shrinkage was too drastic before the administration of the boost, the  
381 response following the boost was compromised. Shorter dosing intervals then elicited the best  
382 response. We note here that the antigen half-life in the GC may be difficult to estimate (34, 51,  
383 52). That GC B cells and plasmablasts were detectable in high frequencies even 12 weeks after  
384 the boost suggests that antigen presented by COVID-19 vaccines may be much longer lasting  
385 in the GCs than expected from their half-life in circulation (24). Such prolonged GC responses  
386 have been observed in other settings (25). Future studies may yield accurate estimates of the  
387 antigen half-life in GCs, which would help identify optimal dosing intervals for the different  
388 COVID-19 vaccines available.

389 Quantitative comparison of our predictions with experimental observations is difficult,  
390 as has been the case with other modeling studies of the GC reaction (34-36, 39, 40, 42, 45).  
391 This is because a number of key biological processes associated with the GC reaction remain

392 to be elucidated, including the link between dosage and the number of GCs seeded, and between  
393 measurable antigen levels in circulation and those within individual GCs (22, 23, 34, 35, 39).  
394 Only recently have these links begun to be evaluated (37). As a simplification, our simulations  
395 have assumed that increased dosage leads to increased antigen availability within GCs while  
396 keeping the number of GCs seeded fixed. It is possible that the number of GCs seeded may  
397 also increase with dosage but with a commensurately smaller rise in the antigen levels per GC.  
398 Future studies that elucidate the links above may help define these quantities better.  
399 Nonetheless, the poorer quality of the antibody response with increasing dosage is a widely  
400 observed and accepted phenomenon (26, 34, 39), giving us confidence in our findings.

401 We recognize that other arms of the immune system that could be triggered by the  
402 vaccines, particularly T cells, may affect the vaccine efficacies realized (5-9, 13, 14). The  
403 strength and timing of the T cell response has been argued to be important in determining the  
404 severity of the infection (59), which in turn may affect the estimated vaccine efficacy (60). We  
405 have focused here on the antibody response, to which the efficacies have been found to be  
406 strongly correlated (18, 19, 60), and which in our simulations qualitatively explained the effects  
407 of the different dosing protocols on vaccine efficacies.

408 Other hypotheses have been proposed to explain the effects of low dose prime and  
409 delayed dosing intervals, the predominant of which has been the undesirable response to the  
410 adenoviral vector in the case of the Oxford/AstraZeneca vaccine that could blunt the response  
411 to the boost (61). While these hypotheses remain to be tested, that the effects are now evident  
412 with more than one vaccine, including lipid nanoparticle mRNA vaccines that do not use the

413 adenoviral vectors (10-13), suggests that the effects are intrinsic to the responses elicited by  
414 the SARS-CoV-2 antigens in the vaccines, supporting our hypothesis.

415 In summary, our study offers an explanation of the confounding effects of different  
416 dosages and dosing protocols on COVID-19 vaccine efficacies. The resulting insights would  
417 inform studies aimed at designing optimal vaccine deployment strategies.

418

## 419 **METHODS**

### 420 **Stochastic simulations of the GC reaction**

421 We developed the following *in silico* stochastic simulation model of the GC reaction  
422 (Fig. 1A). The model builds on a previous study which examined the role of passive  
423 immunization on the GC reaction (39). Here, we adapted it describe the effect of COVID-19  
424 vaccination.

425 **Initialization.** We initiated the GC reaction with  $N=1000$  GC B cells of low affinity for the  
426 target antigen in the light zone of the GC. This follows observations where low affinity seeder  
427 B cells initiate the GC reaction by proliferating rapidly to a steady state size of 1000 cells,  
428 following which somatic hypermutation and affinity maturation commence (36, 39). We  
429 considered a non-mutating antigen, determined by a randomly chosen string of length  $L$  and  
430 alphabet of size  $\kappa=4$ . The alphabet size represents the broad classes of amino acids, namely,  
431 positively charged, negatively charged, polar, and hydrophobic (42). The B cell receptor (BCR)  
432 paratope for each cell is then set by randomly mutating the antigen sequence at  $L-1$  randomly  
433 chosen positions. This ensured that the cells in the initial pool all had low affinities for the  
434 antigen. The B cells were then allowed to acquire antigen.

435 **Antigen acquisition.** Antigen is presented to B cells as antibody-bound immune complexes on  
436 follicular dendritic cell surfaces. The probability with which a B cell successfully acquired the  
437 antigen was  $f_{Ag} = (\varepsilon - \omega + L) / 2L$ , where  $\varepsilon$  and  $\omega$  are the lengths of the longest common  
438 substrings of the antigen sequence and those of the associated B cell receptor (BCR) and the  
439 presenting antibody, respectively. The latter expression followed from a mechanistic  
440 consideration of bond dissociation triggered by the competition between the BCR and the  
441 antibody for the antigen (39). Note that antibodies are secreted versions of the BCRs and hence  
442 were similarly represented as bit-strings of length  $L$  too. The presenting antibodies were  
443 produced by plasma cells and re-entered the GC via antibody feedback, described below. B  
444 cells were selected at random for antigen acquisition, with each B cell selected  $\eta$  times on  
445 average. The amount of antigen acquired by a B cell was set equal to the number of successful  
446 acquisition attempts, denoted as  $\theta$ . B cells had to acquire a minimum amount of antigen,  
447 denoted  $\theta_c$ , for them to survive. Surviving cells were eligible to receive help from T follicular  
448 helper ( $T_{fh}$ ) cells. We capped the level of antigen acquired at  $\theta_\infty$ , at which point the B cell may  
449 have received saturating levels of stimulatory signals necessary for  $T_{fh}$  cell help.

450  **$T_{fh}$  cell help.** We chose surviving B cells randomly and let each cell receive  $T_{fh}$  cell help with  
451 the probability  $f_T = (\theta - \theta_{\min}) / (\theta_{\max} - \theta_{\min})$ , where  $\theta_{\min}$  is the minimum antigen acquired by the  
452 surviving B cells and  $\theta_{\max} (= \min(\eta, \theta_\infty))$  is the maximum antigen acquired. The probability  
453 follows from the recognition that  $T_{fh}$  cell help depends on the relative and not absolute amount  
454 of antigen acquired (23, 39). Cells that do not receive help died. We continued this with every  
455 surviving cell and stopped if 250 cells successfully received  $T_{fh}$  help.

456 **Cell fate decision.** Of the cells selected above, we chose 5% randomly to become memory B  
457 cells; 5% to become plasma cells; and the rest to migrate to the dark zone of the GC. The  
458 memory B cells were constrained to have a minimum affinity for the antigen (54) (here, match  
459 length 3) and were allowed to survive long-term. The plasma cells exited the GC, commenced  
460 producing antibodies, and died at the rate of 0.015 per generation (Table S1).

461 **Proliferation and mutation.** The cells in the dark zone were allowed to multiply, with each  
462 cell dividing twice. Of the resulting cells, we chose 10% and introduced single random point  
463 mutations in their BCR sequences. The latter frequency was chosen following estimates based  
464 on the somatic hypermutation frequency suggesting that 1 in 10 GC B cells would be mutated  
465 per generation in their antibody variable region genes (23, 36, 39, 42). The two divisions per  
466 cell would bring the cell population back to the  $N \sim 1000$  cells. This completed one generation  
467 of B cell evolution in the GC.

468 **Recycling.** The resulting cells in the dark zone were all allowed to migrate to the light zone,  
469 offering the next generation of cells on which the above process would repeat.

470 **Antibody feedback.** Antibodies produced by plasma cells could traffic back to the GC and  
471 influence antigen presentation (35). Accordingly, following estimated trafficking timescales,  
472 we let antibodies produced by plasma cells in any generation become the antibodies presenting  
473 antigen to B cells two generations later (35, 39). Antibodies were also systemically cleared at  
474 the rate of 0.01165 per generation (Table S1).

475 **Termination.** We repeated the above process for up to 250 generations (~18 weeks) or if the  
476 cell population declined, leading to GC collapse.

477



## 478 **Dosing protocol**

479 We implemented the prime-boost dosing protocol by letting  $\eta$  vary with time as  
480  $\eta = \eta_0 \exp(-t \times \ln 2 / \tau)$ , mimicking antigen rise immediately upon dosing (to  $\eta_0$ ) and an exponential  
481 decline subsequently with half-life  $\tau$  (34, 39, 46). The decline is assumed to subsume any loss  
482 of antigen due to acquisition by B cells. We set  $\eta_0$  based on whether a low or standard dose  
483 was employed. The prime and boost were separated by the duration  $\Delta$ . Our interest is in large  
484 values of  $\Delta$  and low first dosages, so that at the time of boost administration, the residual antigen  
485 is small. Whether memory B cells seed GCs post boost is a topic of active current research (47,  
486 48, 53, 54, 62, 63). We therefore considered all potential scenarios, with the boost 1) feeding  
487 into existing GCs; 2) seeding new GCs using memory B cells; 3) seeding new GCs using naïve  
488 B cells. In scenario 2, we let the memory B cells for seeding the GCs be chosen with a  
489 probability proportional to their affinity for the antigen. In other words, the distribution of B  
490 cells of different affinities in the seeder pool mimics the distribution of affinity-weighted  
491 fractions of memory B cells formed following the prime.

492

## 493 **Parameter values**

494 The parameter values employed and their sources are listed in Table S1.

495

## 496 **Quantification of the GC response**

497 With each parameter setting, we performed 2500 realizations, which we divided into 25  
498 ensembles of 100 GC realizations each (39). The average GC B cell affinity in the  $g^{\text{th}}$  generation  
499 was calculated using,

500

$$\alpha(g) = \left\langle \frac{\sum_{i=1}^{100} \sum_{j=1}^{n_i(g)} a_{ij}(g)}{\sum_{i=1}^{100} n_i(g)} \right\rangle_{25}$$

501 where  $a_{ij}$  was the affinity of the  $j^{\text{th}}$  B cell among the  $n_i(g)$  B cells in the  $g^{\text{th}}$  generation of the  $i^{\text{th}}$   
502 realization of an ensemble. The angular brackets represent averaging across the ensembles. The  
503 affinity-weighted plasma cell output in the  $g^{\text{th}}$  generation was

504

$$w(g) = \left\langle \sum_{i=1}^{100} \sum_{\varepsilon=1}^L p_{\varepsilon}^i(g) \frac{\varepsilon}{L} \right\rangle_{25}$$

505 where  $p_{\varepsilon}^i(g)$  was the number of plasma cells with affinity  $\varepsilon$  in the  $g^{\text{th}}$  generation. If plasma cells  
506 died at the per capita rate  $\delta_p$ , then the affinity-weighted cumulative plasma cell output would  
507 be

508

$$P(g) = \sum_{\varphi=1}^g w(\varphi) \exp(-\delta_p(g - \varphi)).$$

509 If the antibody production rate of plasma cells was  $\beta$  per generation (64), the instantaneous  
510 affinity-weighted antibody output would be  $\beta P(g)$ , which given the clearance rate,  $\delta_A$ , of  
511 circulating antibodies yielded the affinity-weighted cumulative antibody output as

512

$$\gamma(g) = \sum_{\varphi=1}^g \beta P(\varphi) \exp(-\delta_A(g - \varphi)).$$

513 We performed the simulations and analysed the results using programs written in MATLAB.

514

## 515 **COMPETING INTERESTS**

516 The authors declare that no conflicts of interests exist.

517

## 518 REFERENCES

- 519 1. O. J. Wouters *et al.*, Challenges in ensuring global access to COVID-19 vaccines: production,  
520 affordability, allocation, and deployment. *Lancet* **397**, 1023-1034 (2021).
- 521 2. G. Forni, A. Mantovani, COVID-19 vaccines: where we stand and challenges ahead. *Cell Death*  
522 *Differ* **28**, 626-639 (2021).
- 523 3. C. M. Saad-Roy *et al.*, Epidemiological and evolutionary considerations of SARS-CoV-2 vaccine  
524 dosing regimes. *Science* 10.1126/science.abg8663 (2021).
- 525 4. K. M. Bubar *et al.*, Model-informed COVID-19 vaccine prioritization strategies by age and  
526 serostatus. *Science* **371**, 916-921 (2021).
- 527 5. M. Voysey *et al.*, Single-dose administration and the influence of the timing of the booster dose on  
528 immunogenicity and efficacy of ChAdOx1 nCoV-19 (AZD1222) vaccine: a pooled analysis of four  
529 randomised trials. *Lancet* **397**, 881-891 (2021).
- 530 6. M. Voysey *et al.*, Safety and efficacy of the ChAdOx1 nCoV-19 vaccine (AZD1222) against SARS-  
531 CoV-2: an interim analysis of four randomised controlled trials in Brazil, South Africa, and the UK.  
532 *Lancet* **397**, 99-111 (2021).
- 533 7. P. M. Folegatti *et al.*, Safety and immunogenicity of the ChAdOx1 nCoV-19 vaccine against SARS-  
534 CoV-2: a preliminary report of a phase 1/2, single-blind, randomised controlled trial. *Lancet* **396**,  
535 467-478 (2020).
- 536 8. M. N. Ramasamy *et al.*, Safety and immunogenicity of ChAdOx1 nCoV-19 vaccine administered in a  
537 prime-boost regimen in young and old adults (COV002): a single-blind, randomised, controlled,  
538 phase 2/3 trial. *Lancet* **396**, 1979-1993 (2021).
- 539 9. A. Flaxman *et al.*, Tolerability and immunogenicity after a late second dose or a third dose of  
540 ChAdOx1 nCoV-19 (AZD1222). *Preprint* 10.2139/ssrn.3873839.,  
541 [https://papers.ssrn.com/sol3/papers.cfm?abstract\\_id=3873839](https://papers.ssrn.com/sol3/papers.cfm?abstract_id=3873839) (2021).
- 542 10. H. Parry *et al.*, Extended interval BNT162b2 vaccination enhances peak antibody generation in older  
543 people. *medRxiv* 10.1101/2021.05.15.21257017, 2021.2005.2015.21257017 (2021).
- 544 11. H. Victoria *et al.*, Delayed interval BNT162b2 mRNA COVID-19 vaccination provides robust  
545 immunity. *Nature Portfolio* 10.21203/rs.3.rs-793234/v1 (2021).
- 546 12. R. Payne *et al.* (2021) Sustained T cell immunity, protection and boosting using extended dosing  
547 intervals of BNT162b2 mRNA vaccine. [https://www.pitch-](https://www.pitch-study.org/PITCH_Dosing_Interval_23072021.pdf)  
548 [study.org/PITCH\\_Dosing\\_Interval\\_23072021.pdf](https://www.pitch-study.org/PITCH_Dosing_Interval_23072021.pdf)
- 549 13. J. Mateus *et al.*, Low dose mRNA-1273 COVID-19 vaccine generates durable T cell memory and  
550 antibodies enhanced by pre-existing crossreactive T cell memory. *medRxiv*  
551 10.1101/2021.06.30.21259787, 2021.2006.2030.21259787 (2021).
- 552 14. M. Sadarangani, A. Marchant, T. R. Kollmann, Immunological mechanisms of vaccine-induced  
553 protection against COVID-19 in humans. *Nat Rev Immunol* **21**, 475-484 (2021).
- 554 15. L. R. Baden *et al.*, Efficacy and safety of the mRNA-1273 SARS-CoV-2 vaccine. *N Engl J Med* **384**,  
555 403-416 (2021).
- 556 16. D. Y. Logunov *et al.*, Safety and efficacy of an rAd26 and rAd5 vector-based heterologous prime-  
557 boost COVID-19 vaccine: an interim analysis of a randomised controlled phase 3 trial in Russia.  
558 *Lancet* **397**, 671-681 (2021).
- 559 17. F. P. Polack *et al.*, Safety and efficacy of the BNT162b2 mRNA COVID-19 Vaccine. *N Engl J Med*  
560 **383**, 2603-2615 (2020).
- 561 18. D. S. Khoury *et al.*, Neutralizing antibody levels are highly predictive of immune protection from  
562 symptomatic SARS-CoV-2 infection. *Nat Med* 10.1038/s41591-021-01377-8 (2021).
- 563 19. K. A. Earle *et al.*, Evidence for antibody as a protective correlate for COVID-19 vaccines. *Vaccine*  
564 **39**, 4423-4428 (2021).
- 565 20. F. Krammer, A correlate of protection for SARS-CoV-2 vaccines is urgently needed. *Nat Med* **27**,  
566 1147-1148 (2021).

- 567 21. J. R. Barrett *et al.*, Phase 1/2 trial of SARS-CoV-2 vaccine ChAdOx1 nCoV-19 with a booster dose  
568 induces multifunctional antibody responses. *Nat Med* **27**, 279-288 (2021).
- 569 22. J. G. Cyster, C. D. C. Allen, B cell responses: cell interaction dynamics and decisions. *Cell* **177**, 524-  
570 540 (2019).
- 571 23. G. D. Victora, M. C. Nussenzweig, Germinal centers. *Annu Rev Immunol* **30**, 429-457 (2012).
- 572 24. J. S. Turner *et al.*, SARS-CoV-2 mRNA vaccines induce persistent human germinal centre responses.  
573 *Nature* 10.1038/s41586-021-03738-2 (2021).
- 574 25. C. W. Davis *et al.*, Longitudinal analysis of the human B cell response to Ebola virus infection. *Cell*  
575 **177**, 1566-1582.e1517 (2019).
- 576 26. H. N. Eisen, G. W. Siskind, Variations in affinities of antibodies during the immune response.  
577 *Biochemistry* **3**, 996-1008 (1964).
- 578 27. M. Bonsignori *et al.*, Maturation pathway from germline to broad HIV-1 neutralizer of a CD4-mimic  
579 antibody. *Cell* **165**, 449-463 (2016).
- 580 28. J. Foote, H. N. Eisen, Kinetic and affinity limits on antibodies produced during immune responses.  
581 *Proc Natl Acad Sci U S A* **92**, 1254-1256 (1995).
- 582 29. J. Foote, H. N. Eisen, Breaking the affinity ceiling for antibodies and T cell receptors. *Proc Natl Acad*  
583 *Sci U S A* **97**, 10679-10681 (2000).
- 584 30. R. Desikan, R. Antia, N. M. Dixit, Physical 'strength' of the multi-protein chain connecting immune  
585 cells: Does the weakest link limit antibody affinity maturation? *Bioessays* **43**, e2000159 (2021).
- 586 31. J. M. Tas *et al.*, Visualizing antibody affinity maturation in germinal centers. *Science* **351**, 1048-1054  
587 (2016).
- 588 32. E. Natkanski *et al.*, B cells use mechanical energy to discriminate antigen affinities. *Science* **340**,  
589 1587-1590 (2013).
- 590 33. K. Kwak *et al.*, Intrinsic properties of human germinal center B cells set antigen affinity thresholds.  
591 *Sci Immunol* **3** (2018).
- 592 34. H. H. Tam *et al.*, Sustained antigen availability during germinal center initiation enhances antibody  
593 responses to vaccination. *Proc Natl Acad Sci U S A* **113**, E6639-E6648 (2016).
- 594 35. Y. Zhang *et al.*, Germinal center B cells govern their own fate via antibody feedback. *J Exp Med* **210**,  
595 457-464 (2013).
- 596 36. S. Wang *et al.*, Manipulating the selection forces during affinity maturation to generate cross-reactive  
597 HIV antibodies. *Cell* **160**, 785-797 (2015).
- 598 37. Y. Kato *et al.*, Multifaceted effects of antigen valency on B cell response composition and  
599 differentiation in vivo. *Immunity* **53**, 548-563 e548 (2020).
- 600 38. T. Schoofs *et al.*, HIV-1 therapy with monoclonal antibody 3BNC117 elicits host immune responses  
601 against HIV-1. *Science* **352**, 997-1001 (2016).
- 602 39. A. K. Garg, R. Desikan, N. M. Dixit, Preferential presentation of high-affinity immune complexes in  
603 germinal centers can explain how passive immunization improves the humoral response. *Cell Rep* **29**,  
604 3946-3957 e3945 (2019).
- 605 40. R. J. De Boer, A. S. Perelson, How germinal centers evolve broadly neutralizing antibodies: The  
606 breadth of the follicular helper T cell response. *J Virol* **91** (2017).
- 607 41. M. Meyer-Hermann *et al.*, A theory of germinal center B cell selection, division, and exit. *Cell Rep* **2**,  
608 162-174 (2012).
- 609 42. S. Luo, A. S. Perelson, Competitive exclusion by autologous antibodies can prevent broad HIV-1  
610 antibodies from arising. *Proc Natl Acad Sci U S A* **112**, 11654-11659 (2015).
- 611 43. M. Oprea, A. S. Perelson, Somatic mutation leads to efficient affinity maturation when centrocytes  
612 recycle back to centroblasts. *J Immunol* **158**, 5155-5162 (1997).
- 613 44. T. B. Kepler, A. S. Perelson, Cyclic re-entry of germinal center B cells and the efficiency of affinity  
614 maturation. *Immunol Today* **14**, 412-415 (1993).
- 615 45. V. I. Zarnitsyna, J. Lavine, A. Ellebedy, R. Ahmed, R. Antia, Multi-epitope models explain how pre-  
616 existing antibodies affect the generation of broadly protective responses to influenza. *PLoS Pathog*  
617 **12**, e1005692 (2016).

- 618 46. K. A. Pape, D. M. Catron, A. A. Itano, M. K. Jenkins, The humoral immune response is initiated in  
619 lymph nodes by B cells that acquire soluble antigen directly in the follicles. *Immunity* **26**, 491-502  
620 (2007).
- 621 47. K. A. Pape, M. K. Jenkins, Do memory B cells form secondary germinal centers?: it depends. *Cold  
622 Spring Harb Perspect Biol* **10**, a029116 (2018).
- 623 48. M. J. Shlomchik, Do memory B cells form secondary germinal centers?: yes and no. *Cold Spring  
624 Harb Perspect Biol* **10**, a029405 (2018).
- 625 49. K. Tripathi, R. Balagam, N. K. Vishnoi, N. M. Dixit, Stochastic simulations suggest that HIV-1  
626 survives close to its error threshold. *PLoS Comput Biol* **8**, e1002684 (2012).
- 627 50. S. Gadhamsetty, N. M. Dixit, Estimating frequencies of minority nevirapine-resistant strains in  
628 chronically HIV-1-infected individuals naive to nevirapine by using stochastic simulations and a  
629 mathematical model. *J Virol* **84**, 10230-10240 (2010).
- 630 51. B. A. Heesters, C. E. van der Poel, A. Das, M. C. Carroll, Antigen presentation to B cells. *Trends  
631 Immunol* **37**, 844-854 (2016).
- 632 52. B. A. Heesters, R. C. Myers, M. C. Carroll, Follicular dendritic cells: dynamic antigen libraries. *Nat  
633 Rev Immunol* **14**, 495-504 (2014).
- 634 53. L. J. McHeyzer-Williams, C. Dufaud, M. G. McHeyzer-Williams, Do memory B cells form  
635 secondary germinal centers?: impact of antibody class and quality of memory T-cell help at recall.  
636 *Cold Spring Harb Perspect Biol* **10**, a028878 (2018).
- 637 54. F. Weisel, M. Shlomchik, Memory B cells of mice and humans. *Ann Rev Immunol* **35**, 255-284  
638 (2017).
- 639 55. O. F. Brandenburg *et al.*, Predicting HIV-1 transmission and antibody neutralization efficacy in vivo  
640 from stoichiometric parameters. *PLoS Pathog* **13**, e1006313 (2017).
- 641 56. S. N. Mulampaka, N. M. Dixit, Estimating the threshold surface density of Gp120-CCR5 complexes  
642 necessary for HIV-1 envelope-mediated cell-cell fusion. *PLoS One* **6**, e19941 (2011).
- 643 57. P. Padmanabhan, N. M. Dixit, Mathematical model of viral kinetics in vitro estimates the number of  
644 E2-CD81 complexes necessary for hepatitis C virus entry. *PLoS Comput Biol* **7**, e1002307 (2011).
- 645 58. M. J. van Gils, R. W. Sanders, In vivo protection by broadly neutralizing HIV antibodies. *Trends  
646 Microbiol* **22**, 550-551 (2014).
- 647 59. B. Chatterjee, H. S. Sandhu, N. M. Dixit, The relative strength and timing of innate immune and CD8  
648 T-cell responses underlie the heterogeneous outcomes of SARS-CoV-2 infection. *medRxiv*  
649 10.1101/2021.06.15.21258935, 2021.2006.2015.21258935 (2021).
- 650 60. P. Padmanabhan, R. Desikan, N. M. Dixit, Modelling the population-level protection conferred by  
651 COVID-19 vaccination. *medRxiv* 10.1101/2021.03.16.21253742, 2021.2003.2016.21253742 (2021).
- 652 61. E. Callaway, Why Oxford's positive COVID vaccine results are puzzling scientists. *Nature* **588**, 16-  
653 18 (2020).
- 654 62. L. Mesin *et al.*, Restricted clonality and limited germinal center reentry characterize memory B cell  
655 reactivation by boosting. *Cell* **180**, 92-106.e111 (2020).
- 656 63. C. Viant *et al.*, Antibody affinity shapes the choice between memory and germinal center B cell fates.  
657 *Cell* **183**, 1298-1311.e1211 (2020).
- 658 64. K. Roberts, B. Alberts, A. Johnson, P. Walter, T. Hunt, Molecular biology of the cell. 4<sup>th</sup> edition. *New  
659 York: Garland Science* (2002).

660

661 **Supplementary Materials for**

662

663 **Low dose prime and delayed boost can improve COVID-19 vaccine efficacies by**  
664 **increasing B cell selection stringency in germinal centres**

665

666 Amar K. Garg<sup>1,#</sup>, Soumya Mittal<sup>1</sup>, Pranesh Padmanabhan<sup>2</sup>, Rajat Desikan<sup>1,‡</sup>, Narendra M. Dixit<sup>1,3,\*</sup>

667

668 <sup>1</sup>Department of Chemical Engineering, Indian Institute of Science, Bangalore, India 560012

669 <sup>2</sup>Clem Jones Centre for Ageing Dementia Research, Queensland Brain Institute, The University of Queensland,

670 Brisbane, Australia 4072

671 <sup>3</sup>Centre for Biosystems Science and Engineering, Indian Institute of Science, Bangalore, India 560012

672 <sup>#</sup>Current Address: Helmholtz Centre for Infection Research, Braunschweig, Germany

673 <sup>‡</sup>Current Address: Certara QSP, Certara UK Limited, Sheffield, UK

674

675 **\*Correspondence:**

676 Narendra M. Dixit

677 Email: [narendra@iisc.ac.in](mailto:narendra@iisc.ac.in)

678

679

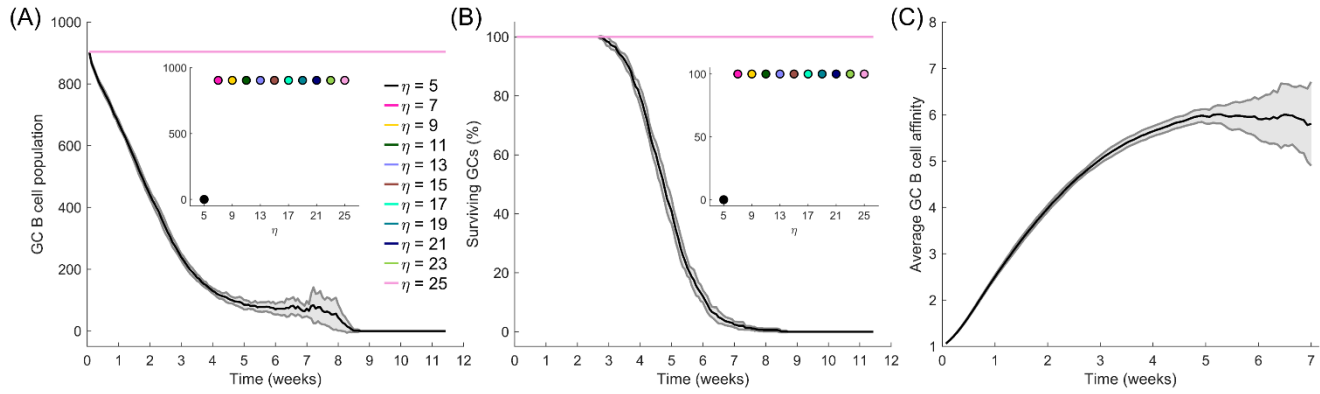

680

681

682 **Figure S1. Influence of  $\eta$ .** Time series of (A) GC B cell population and (B) percent surviving  
683 GCs for simulations with various  $\eta$ . GCs with low  $\eta$  ( $=5$  here) have high rates of apoptosis  
684 which result in GCs gradually being extinguished with time. However, these GCs also exhibit  
685 accelerated affinity maturation (C) due to the higher selection stringencies. Insets: values at the  
686 final time point.

687

688

689

It is made available under a [CC-BY-NC-ND 4.0 International license](https://creativecommons.org/licenses/by-nc-nd/4.0/) .

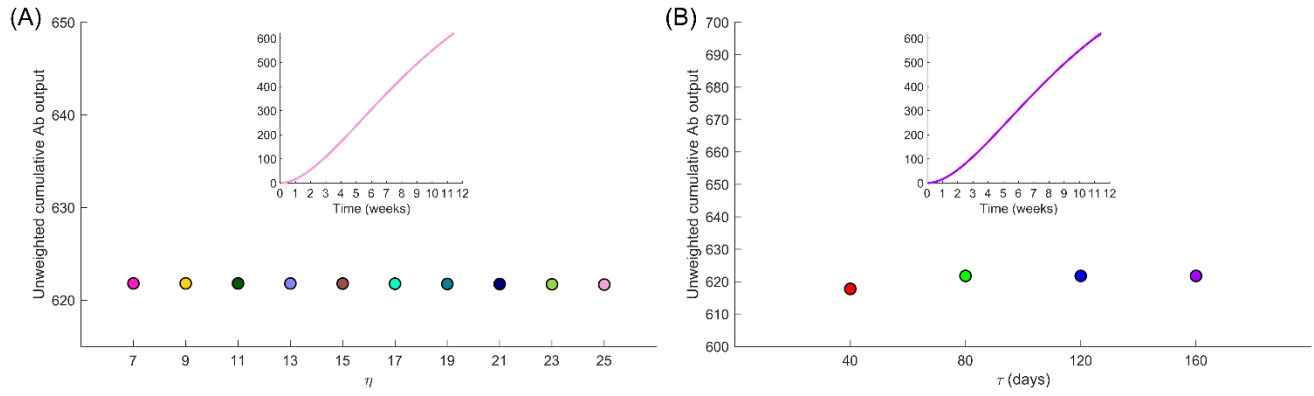

690

691 **Figure S2. Absolute Ab output.** Unweighted cumulative antibody output at the final time  
692 point for various (A)  $\eta$ , and (B)  $\tau$ . Insets: time series. The curves for the different cases overlap.

693

694



695

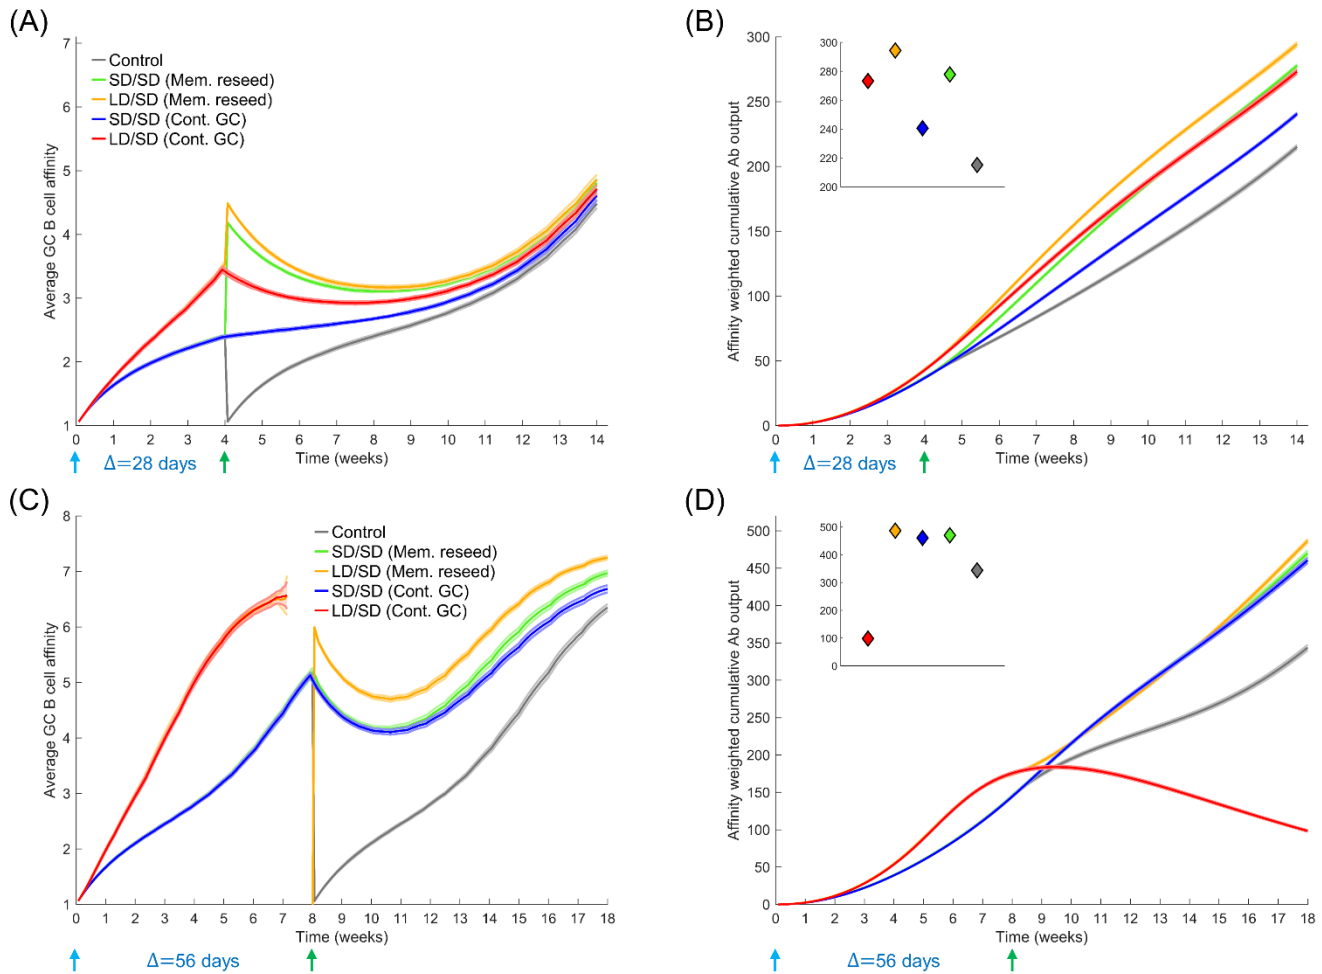

696

697

698 **Figure S3. Influence of initial Ag levels (dose) and the prime-boost dosing interval ( $\Delta$ ).**  
699 (A) Average GC B cell affinity, and (B) affinity-weighted Ab output with a prime-boost  
700 interval  $\Delta=28$  d and antigen half-life  $\tau=40$  d, either with LD/SD or SD/SD dosing (LD and SD  
701 correspond to  $\eta_0=15$  and 30, respectively). These trends are qualitatively similar to those in  
702 Figure 3. (C) Average GC B cell affinity, and (D) affinity-weighted Ab output with  $\Delta=56$  d and  
703  $\tau=40$  d, either with LD/SD or SD/SD dosing (LD and SD correspond to the default  $\eta_0=10$  and  
704 20, respectively). Insets: values at the final time point.

705

706

It is made available under a [CC-BY-NC-ND 4.0 International license](https://creativecommons.org/licenses/by-nc-nd/4.0/).

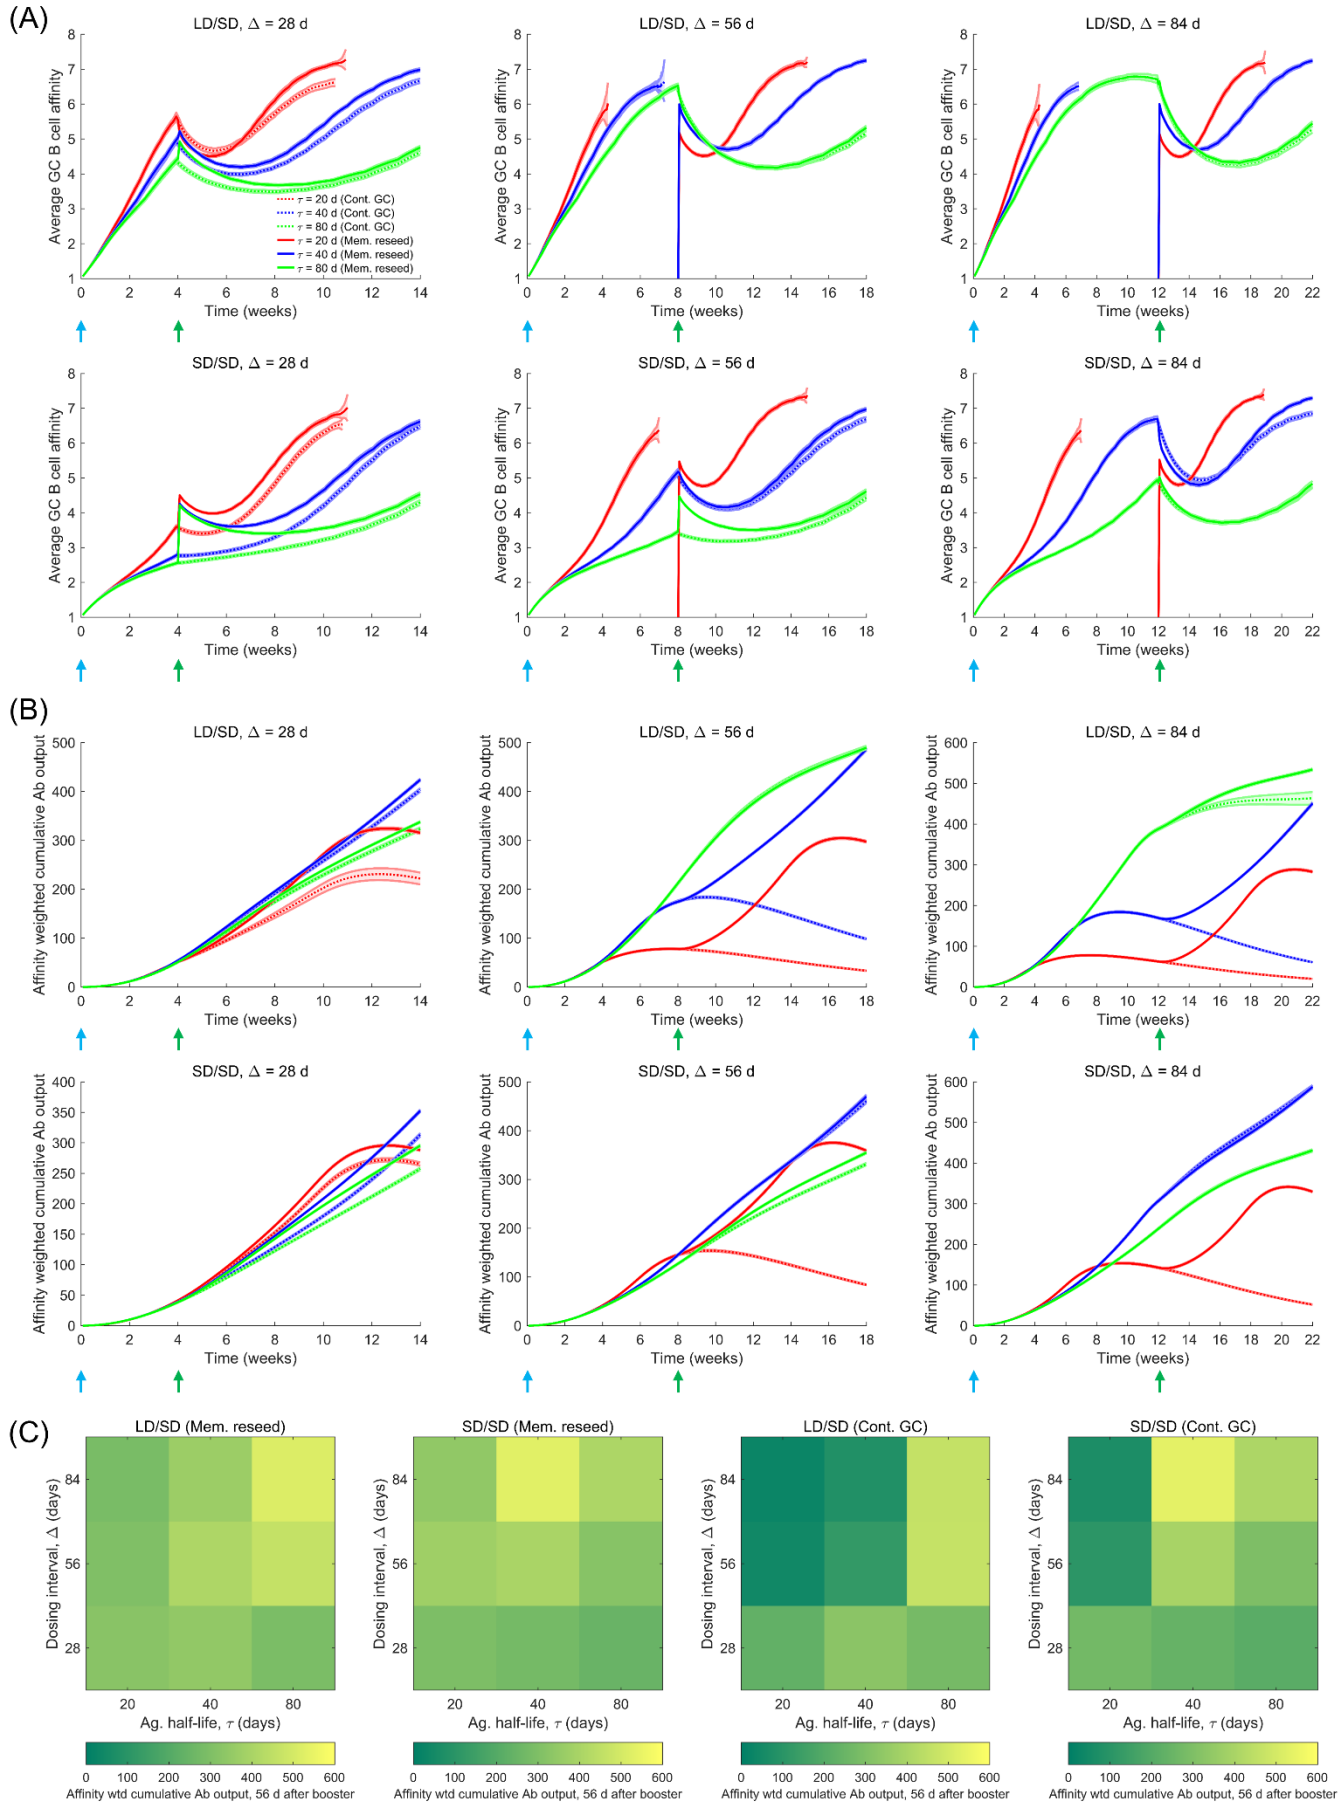

709 **Figure S4. Influence of the prime-boost dosing interval ( $\Delta$ ).** Time series of (A) average GC  
710 B cell affinities, and (B) affinity-weighted Ab outputs corresponding to the heatmaps in Figure  
711 4E and 4F, respectively. (C) Heatmaps of the affinity-weighted cumulative Ab output 56 d post  
712 the boost, as a function of  $\tau$  (20, 40 and 80 d) and  $\Delta$  (4, 8, and 12 weeks) for the two limiting  
713 scenarios (Mem. reseed and Cont. GC).

714

715

---

716 **Table S1. Model parameters and their values.**

| <i>Symbol</i>   | <i>Description</i>                                            | <i>Value (units)</i>                                 | <i>Refs.</i> |
|-----------------|---------------------------------------------------------------|------------------------------------------------------|--------------|
| N               | Number of B cells initiating the GC reaction                  | 1000 (cells)                                         | (36, 39)     |
| L               | String length of antigen, B cell receptor (BCR), and antibody | 8 (dimensionless)                                    | (39, 42)     |
| $\kappa$        | Alphabet size for strings                                     | 4 (dimensionless)                                    | (39, 42)     |
| $\theta_c$      | Minimum amount of acquired antigen for B cell survival        | 3 (dimensionless)                                    | (39)         |
| $\theta_\infty$ | Maximum amount of antigen that can be acquired by a B cell    | 5 (dimensionless)                                    | -            |
| $\delta_p$      | Clearance rate of plasma cells                                | 0.015 (generation <sup>-1</sup> )                    | (34, 44)     |
| $\beta$         | Antibody production rate of plasma cells per generation       | 2000 (molecules cell <sup>-1</sup> s <sup>-1</sup> ) | (64)         |
| $\delta_a$      | Clearance rate of antibodies                                  | 0.01165 (generation <sup>-1</sup> )                  | (34, 44)     |

717

718

719
